# Supplementary material for: Triazine derivatives as organic phase change materials with inherently low flammability
Source: Royal Society of Chemistry journal article supplement (doi:10.1039/d1ta07422a), 2022-01-01

# Triazine Derivatives as Organic Phase Change Materials with Inherently Low Flammability

Zhuang Mao Png,<sup>‡</sup> Xiang Yun Debbie Soo,<sup>‡</sup> Ming Hui Chua, Pin Jin Ong, Jianwei Xu,<sup>\*</sup> Qiang Zhu<sup>\*</sup>

## 1 DSC Spectra

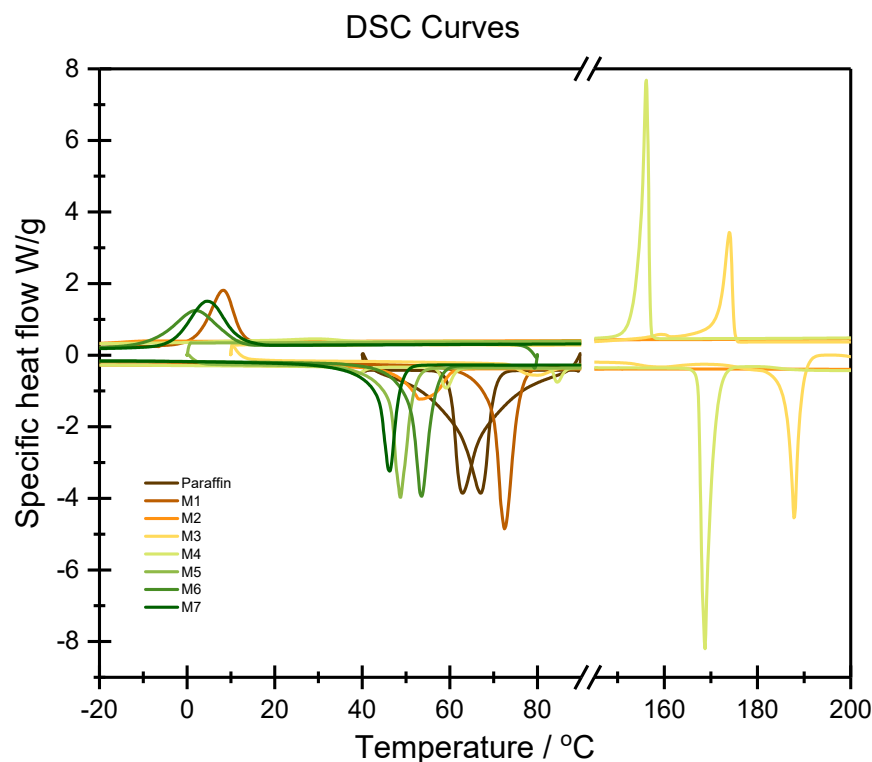

**Figure S1:** Melting and Freezing DSC spectra of M1 to M7 and paraffin.

## 2 Cycling Test of M1

**M1** was subjected to 50 cycles of melting (85 °C) and freezing (RT). The DSC measurements were taken every 10 cycles.

**Table S1:** DSC results of M1 after repeated cycles of melting and freezing

| Number of cycles | Temperature (peak) / °C | $\Delta H$ / Jg <sup>-1</sup> |
|------------------|-------------------------|-------------------------------|
| Original         | 73.5                    | 150.9                         |
| 10 x             | 71.2                    | 149.1                         |
| 20 x             | 69.9                    | 151.2                         |
| 30 x             | 67.6                    | 149.6                         |
| 40 x             | 67.1                    | 149.9                         |
| 50 x             | 67.2                    | 149.5                         |

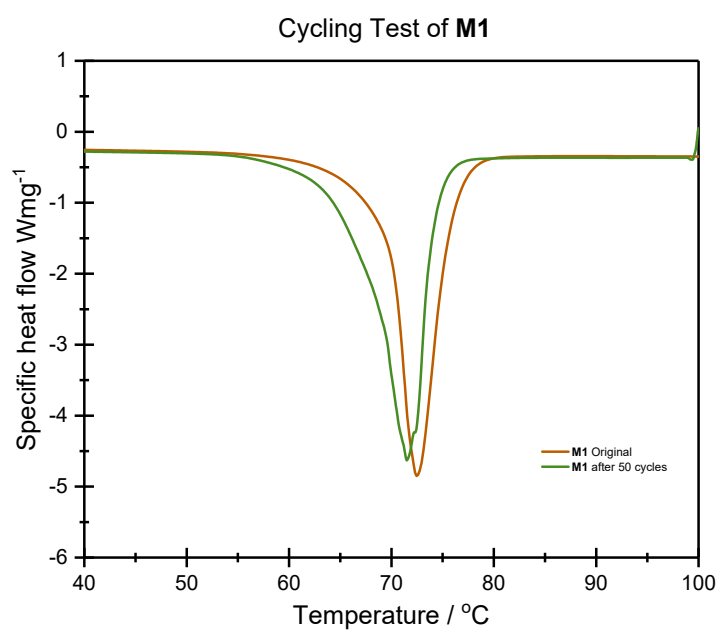

**Figure S2:** DSC of **M1** at the beginning and after 50 melting and freezing cycles.

### 3 Proton and Carbon NMRs

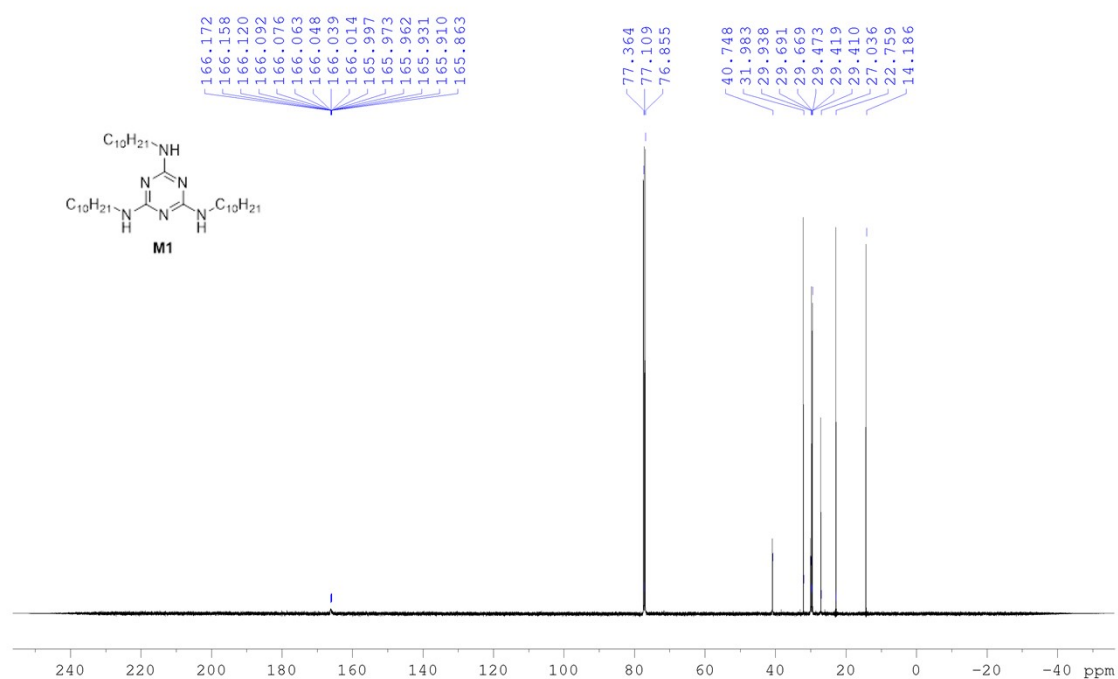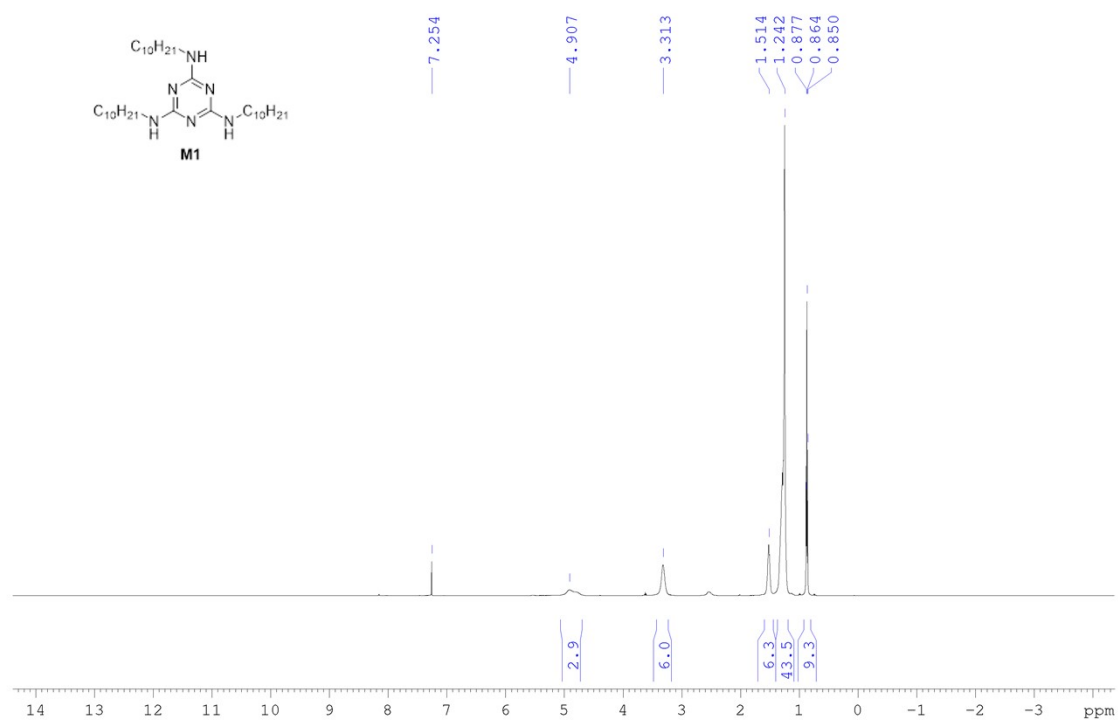

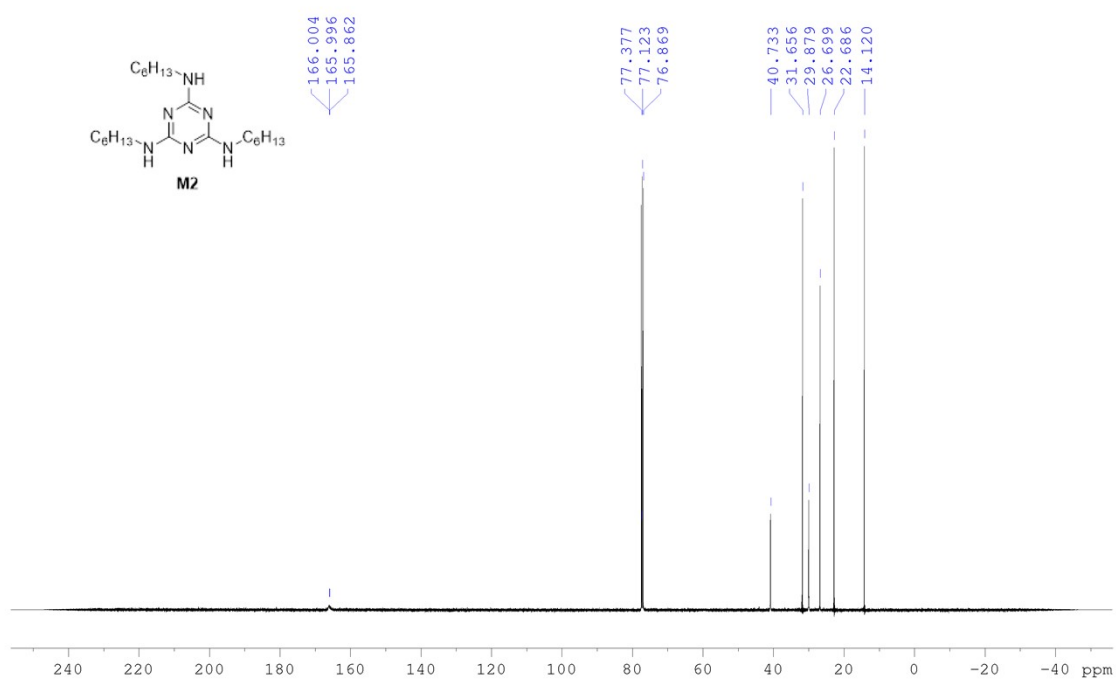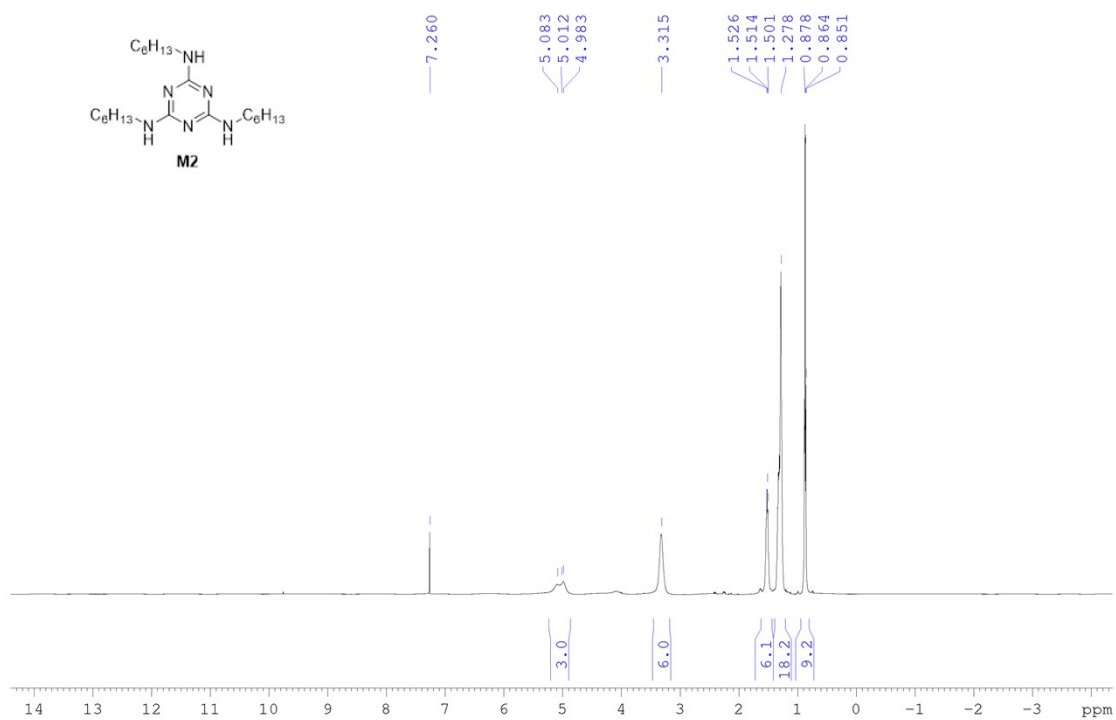

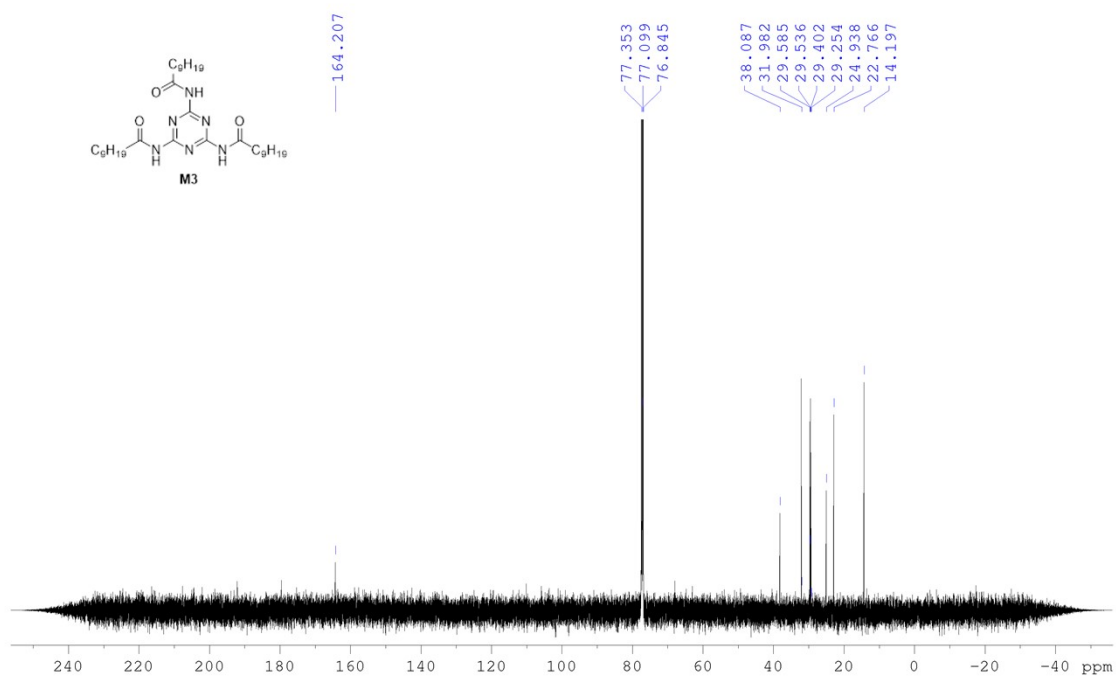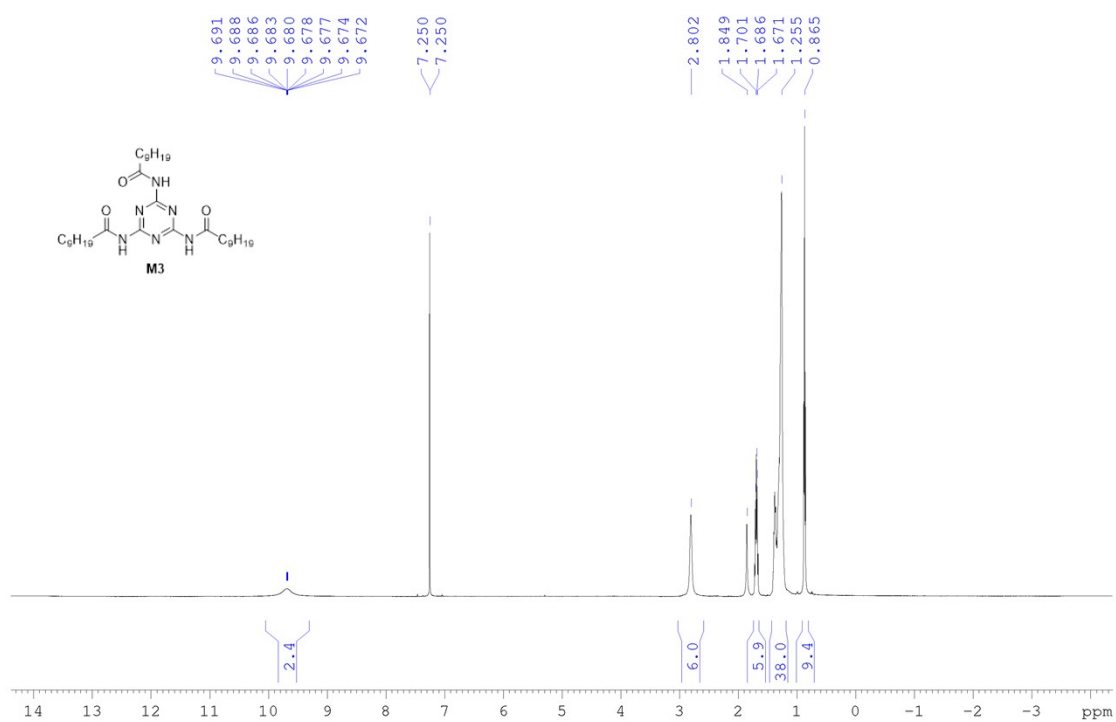

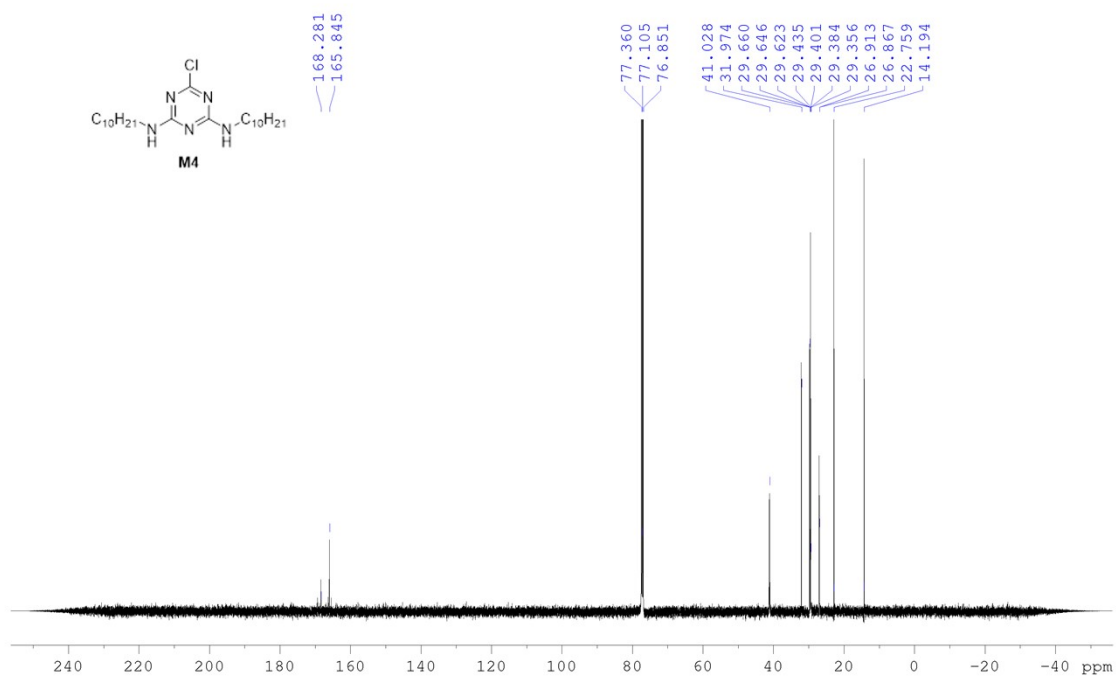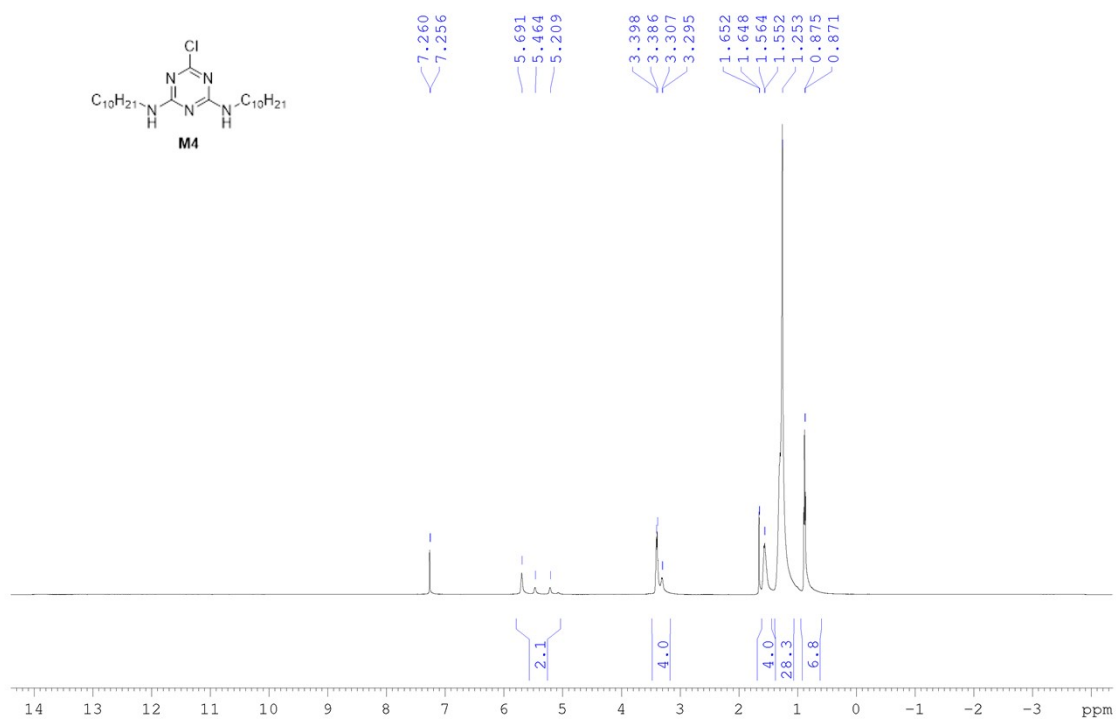

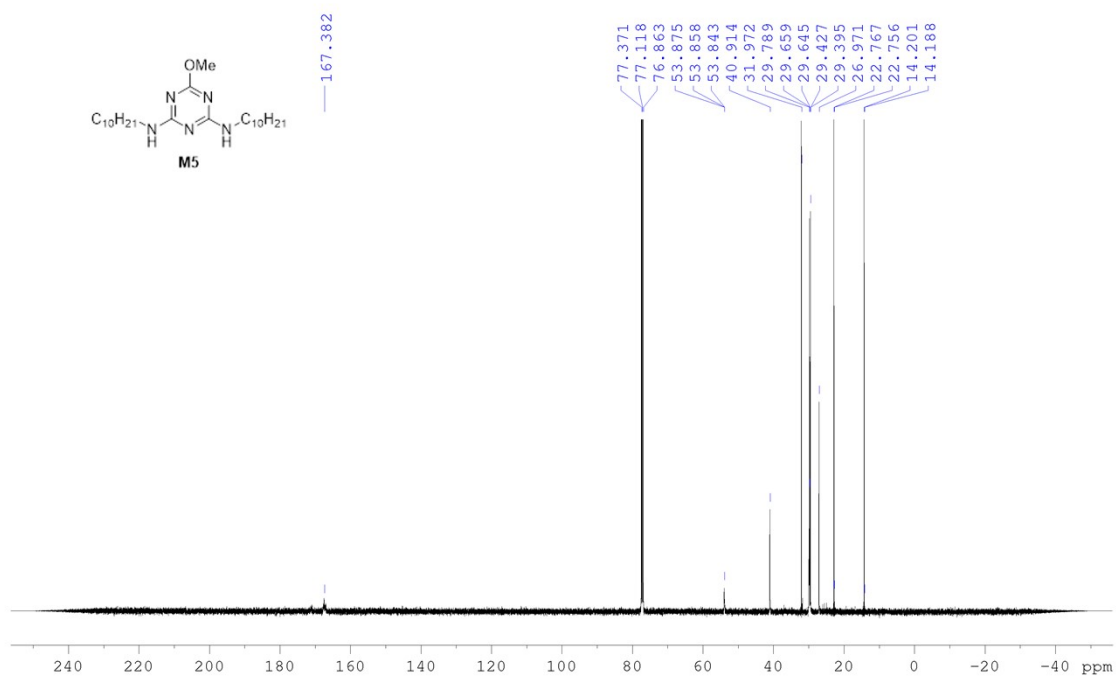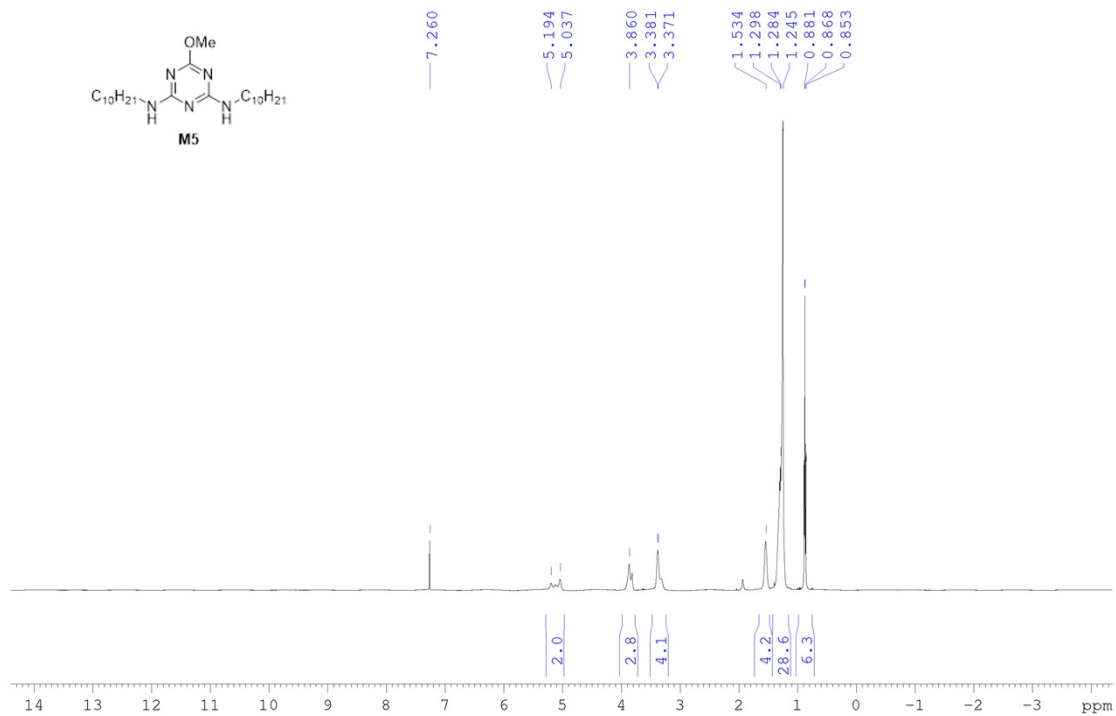

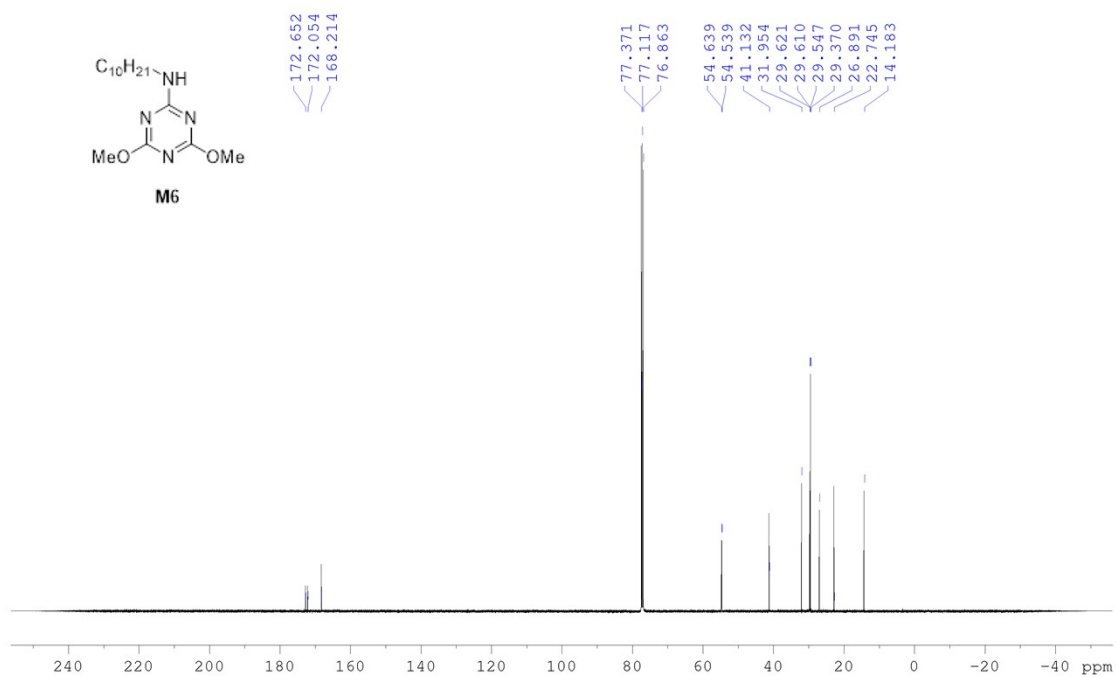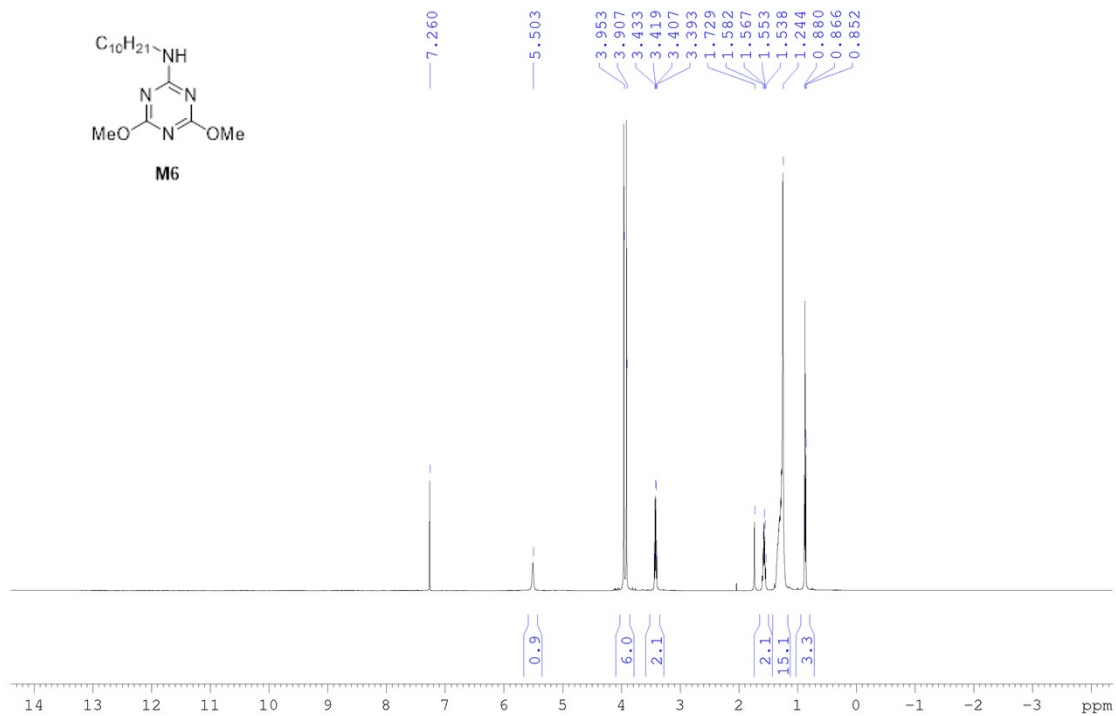



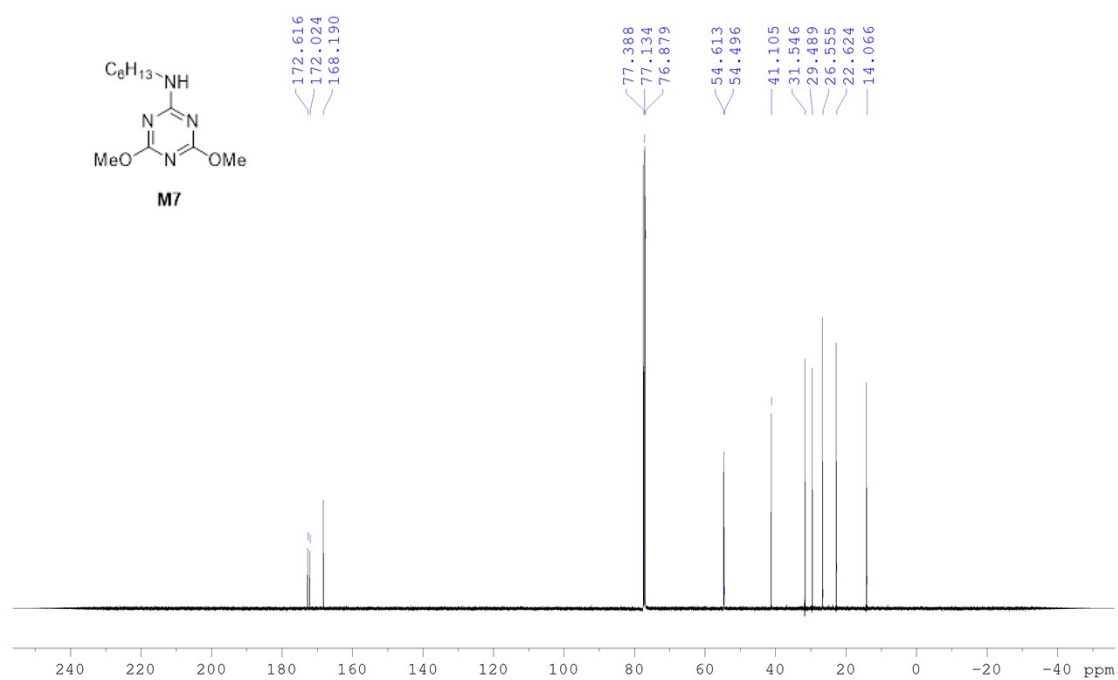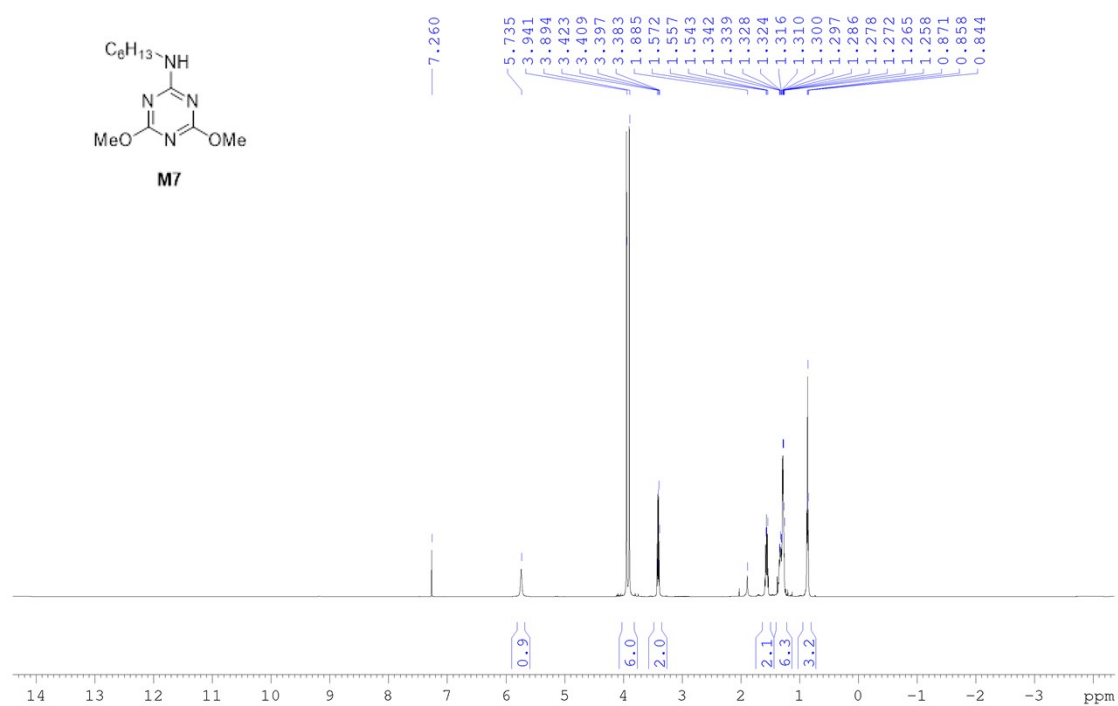

Supplement: d1ta07422a1.pdf [file d1ta07422a1.pdf]
